# Supplementary material for: A Colorimetric Strategy Based on Aptamer-Catalyzed Hairpin Assembly for the On-Site Detection of Salmonella typhimurium in Milk
Source: MDPI journal article supplement (doi:10.3390/foods10112539), 2021-10-22
Supplement: s1 [file s1]

## SUPPLEMENTARY MATERIALS

### **A colorimetric strategy based on aptamer catalyzed hairpin assembly for the on-site detection of *Salmonella typhimurium* in milk**

Sihan Chen <sup>1</sup>, Xinran Zong <sup>1</sup>, Jiapeng Zheng <sup>1</sup>, Jiaxin Zhang <sup>1</sup>, Mengyao Zhou <sup>1</sup>, Qing Chen <sup>1</sup>, Chaoxin Man <sup>1,\*</sup> and Yujun Jiang <sup>1,\*</sup>

<sup>1</sup> Key Laboratory of Dairy Science, Ministry of Education, Department of Food Science, Northeast Agricultural University, Harbin 150030, China

---

\*Corresponding authors: yujun\_jiang@163.com and mcxwh2006@qq.com

**Table S1.** The sequences of the oligonucleotides in this work.

| Name | Sequence (5' to 3')                                                                                |
|------|----------------------------------------------------------------------------------------------------|
| Bapt | biotin-<br>GAGGAAAGTCTATAGCAGAGGAGATGTGTGAACCGAGTAA                                                |
| Tapt | TATGGCGGCGTCACCCGACGGGGACTTGACATTATGACAG                                                           |
| Y1   | CTGTCATAATGTCAAGTCCCCGTCGGGTGACGCCGCCATATATGG<br>CGGCGCGCCGCCATATATGGCGGCGTCACCCGACGGGGACTTGA<br>C |
| Y2   | CGTCGGGTGACGCCGCCATATATGGCGGCGCGCCGCCATAGGGA<br>CTTGACATTATGACAGTATGGCGGCGCGCCGCCATATATGGCGGC<br>G |
| Y3   | TATGGCGGCGCGCCGCCATACTGTCATAATGTCAAGTCCCTATGG<br>CGGCGTCACCCGACGGGGACTTGACATTATGACAGTATGGCGGC<br>G |
| Y1*  | GTCAAGTCCCCGTCGGGTGACGCCGCCATATATGGCGGCGCGCC<br>GCCATATATGGCGGCGTCACCCGACGGGGACTTGAC               |
| Y2*  | CGCCGCCATATATGGCGGCGCGCCGCCATAGGGACTTGACATTAT<br>GACAGTATGGCGGCGCGCCGCCATATATGGCGGCG               |
| Y3*  | CGCCGCCATACTGTCATAATGTCAAGTCCCTATGGCGGCGTCACC<br>CGACGGGGACTTGACATTATGACAGTATGGCGGCG               |
| C1   | CTGTCATAATGTCAAGTCCCCGTCGGGTGACGCCGCCATACTATC<br>TACTTACTCTTACTTTATGGCGGCGTCACCCGACGGGGACTTGAC     |
| C2   | CGCCGCCATAAAGTAAGAGTAAGTAGATAGTATGGCGGCGTCAC<br>CCGACGGGGACTTGACCTATCTACTTACTCTTACTT               |

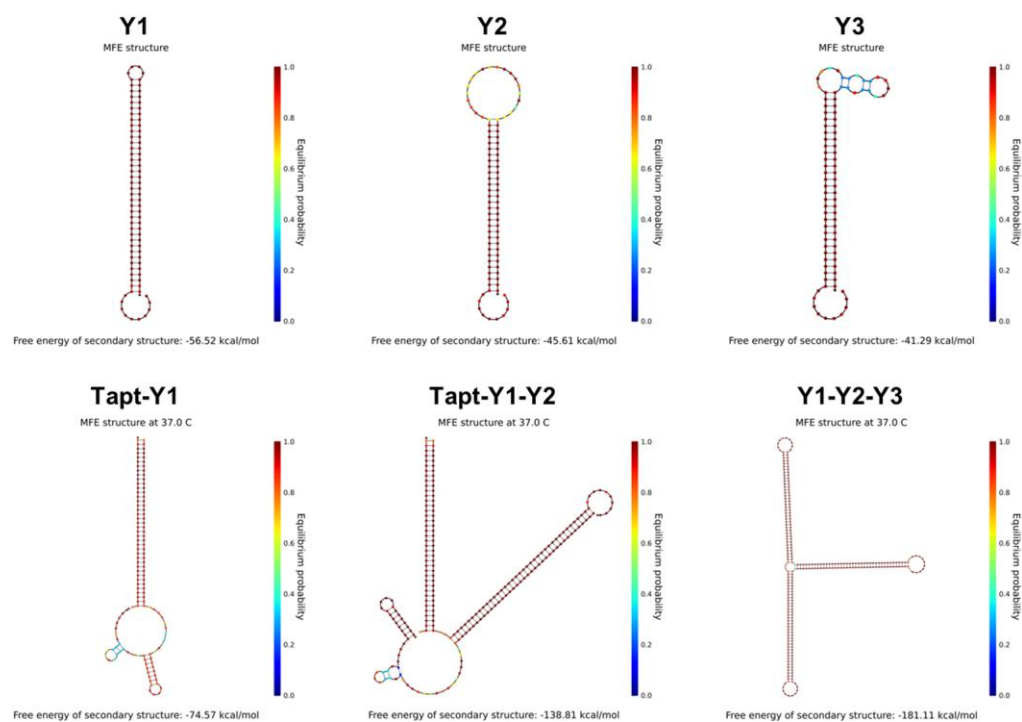

**Figure S1.** Simulation and prediction on the secondary structures of the hairpins Y1, Y2, Y3 and hybrids based on the NUPACK software.

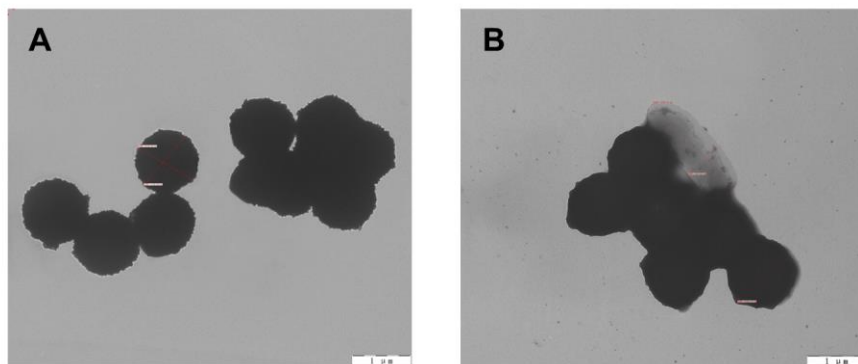

**Figure S2.** TEM image of SMBs (A) and SMBs-Bapt-*S. typhimurium* (B).

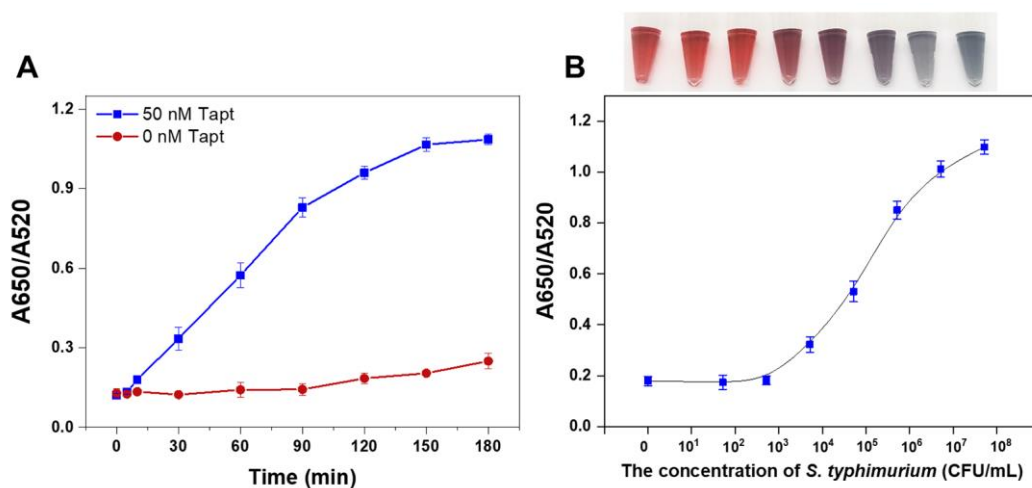

**Figure S3.** Effect of incubation time on conventional CHA (A). Sensitivity of conventional CHA for detection of *S. typhimurium* with concentrations ranging from  $5.2 \times 10^1$  to  $5.2 \times 10^7$  CFU/mL (B). The insert shows the AuNPs visualization colorimetric photo of the corresponding bacterial sample.

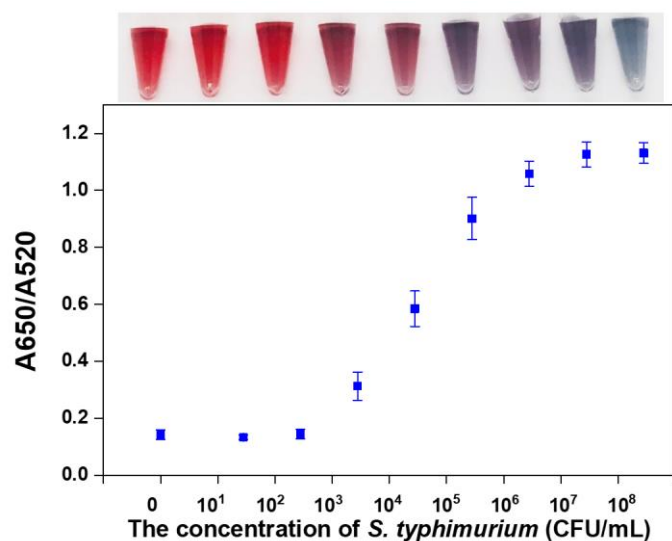

**Figure S4.** Detection of *S. typhimurium* in contaminated milk using the on-site colorimetric strategy based on Y-CHA circuit. The insert shows the AuNPs visualization colorimetric photo of the corresponding bacterial sample.
